# Supplementary material for: Attenuated total reflectance far-ultraviolet and deep-ultraviolet spectroscopy analysis of the electronic structure of a dicyanamide-based ionic liquid with Li+
Source: Royal Society of Chemistry journal article supplement (doi:10.1039/d0cp03865b), 2020-01-01
Supplement: d0cp03865b1.pdf [file d0cp03865b1.pdf]

## ***Electronic Supporting Information***

# **Attenuated Total Reflectance Far-Ultraviolet and Deep-Ultraviolet Spectroscopy Analysis of the Electronic Structure of a Dicyanamide-Based Ionic Liquid with Li<sup>+</sup>**

**Masaya Imai<sup>a</sup>, Ichiro Tanabe<sup>a\*</sup>, Akifumi Ikehata<sup>b</sup>, Yukihiro Ozaki<sup>c,d</sup> and Ken-ichi Fukui<sup>a,e\*</sup>**

<sup>a</sup> Department of Materials Engineering Science, Graduate School of Engineering Science, Osaka University, Toyonaka, Osaka 560-8531, Japan.

<sup>b</sup> National Food Research Institute, National Agriculture and Food Research Organization (NARO), Tsukuba, Ibaraki, 305-8642, Japan.

<sup>c</sup> Department of Chemistry, School of Science and Technology, Kwansei Gakuin University, Sanda, Hyogo, 669-1337, Japan.

<sup>d</sup> Toyota Physical Chemical Research Institute, Nagakute, Aichi 480-1192, Japan.

<sup>e</sup> Department of Photomolecular Science, Institute of Molecular Science, Myodaiji, Okazaki, Aichi 444-8585, Japan.

**\*Corresponding authors: E-mail addresses:**

**[itanabe@chem.es.osaka-u.ac.jp](mailto:itanabe@chem.es.osaka-u.ac.jp) (I.T.) and**

**[kfukui@chem.es.osaka-u.ac.jp](mailto:kfukui@chem.es.osaka-u.ac.jp) (K.F.)**

## **Contents**

1. Detailed time-dependent density functional theory (TD-DFT) calculations
2. Spectral decomposition via multivariable curve resolution-alternating least squares (MCR-ALS) calculations
3. Distance dependent TD-DFT calculations of Li[DCA]<sup>−</sup>
4. Residence autocorrelation function

# 1. Detailed time-dependent density functional theory (TD-DFT) calculations

Table S1 Calculated transition wavelengths, oscillation strength, main initial states, and main final states of [DCA]<sup>−</sup>.

| Wavelength / nm | Oscillation strength | Initial state | Final state |
|-----------------|----------------------|---------------|-------------|
| 226.76          | 0.0081               | HOMO          | LUMO        |
| 189.75          | 0.1784               | HOMO          | LUMO+6      |

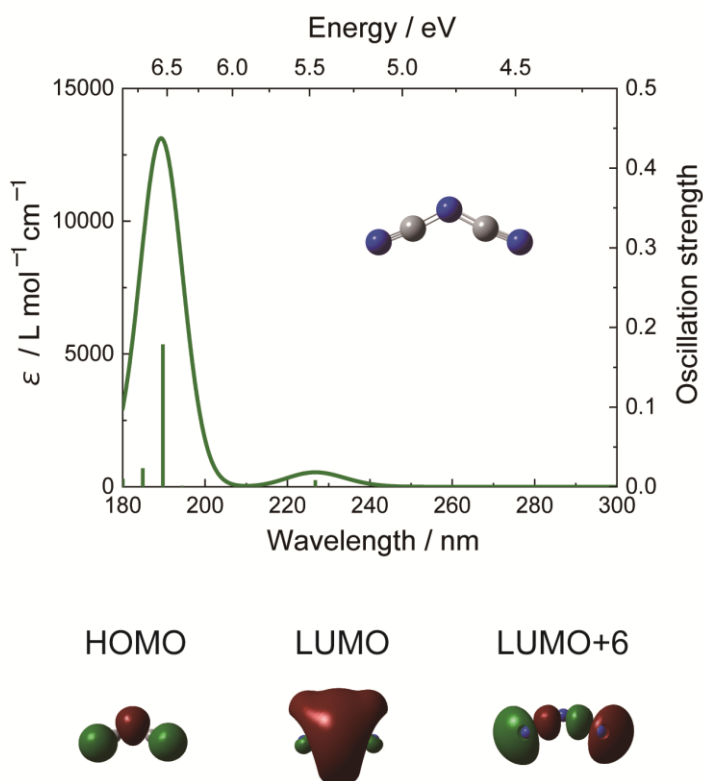

Figure S1 Calculated oscillation strengths and molar extinction coefficient ( $\epsilon$ ) of [DCA]<sup>−</sup>. The molecular orbitals of the main initial and final states are presented at the bottom. This time-dependent density functional theory calculation was performed using the CAM-B3LYP/aug-cc-pVTZ basis set. The surrounding [BMP][DCA] was reflected as a continuum solvation model using the solvation model based on density-generic ionic liquid.

Table S2 Calculated transition wavelengths, oscillation strength, main initial states, and main final states of [BMP]<sup>+</sup>.

| Wavelength / nm | Oscillation strength | Initial state | Final state |
|-----------------|----------------------|---------------|-------------|
| 138.44          | 0.0168               | HOMO-1        | LUMO+1      |
| 133.95          | 0.0429               | HOMO          | LUMO+1      |
| 132.86          | 0.0393               | HOMO          | LUMO+2      |
| 130.79          | 0.0473               | HOMO-1        | LUMO+1      |

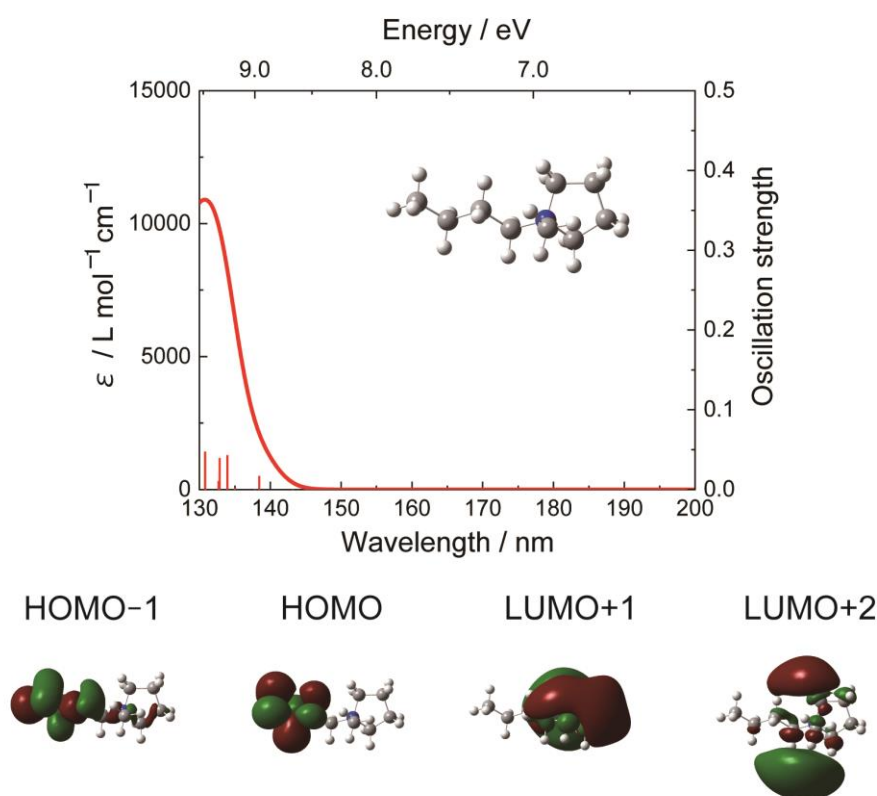

Figure S2 Calculated oscillation strengths and molar extinction coefficients ( $\epsilon$ ) of [BMP]<sup>+</sup>. The molecular orbitals of the main initial and final states are illustrated at the bottom. The optimisation was performed via density functional theory using the B3LYP/aug-cc-pVTZ basis set and the vertical transitions were calculated using the time-dependent density functional theory using the CAM-B3LYP/aug-cc-pVTZ basis set. The surrounding [BMP][DCA] was reflected as a continuum solvation model using the solvation model based on density-generic ionic liquid. Our calculations indicated that the absorption bands that derived from the intramolecular electronic transitions of [BMP]<sup>+</sup> emerged below 130 nm. It was concluded that the electronic absorption of [BMP]<sup>+</sup> did not contribute to the obtained absorption spectra in the 180–300 nm spectral region.

## 2. Spectral decomposition using multivariable curve resolution-alternating least squares (MCR-ALS) calculations

The spectral decompositions illustrated in Figure 4 were performed using the multivariable curve resolution-alternating least squares (MCR-ALS) algorithm in the 180–250 nm spectral region. The detailed processes are presented below.

The absorption spectra of the Li-IL are illustrated in an 8 (number of concentrations of  $\text{Li}^+$  except for 0 M)  $\times$  701 (number of absorption data) matrix ( $\mathbf{A}$ ). Our goal was to decompose  $\mathbf{A}$  into  $\mathbf{A}_{\text{IL}}$  and  $\mathbf{A}_{\text{Li[DCA]}}$ , the matrices of the absorption spectra derived from  $[\text{DCA}]^-$  without and with the effect of  $\text{Li}^+$  on the levels of the electronic states, respectively:

$$\mathbf{A} = \mathbf{A}_{\text{IL}} + \mathbf{A}_{\text{Li[DCA]}}. \quad (\text{S1})$$

We assumed that  $\mathbf{A}_{\text{IL}}$  can be expressed using the contribution vector of pure  $[\text{BMP}][\text{DCA}]$  ( $\mathbf{t}^x$ ) and the spectrum of pure  $[\text{BMP}][\text{DCA}]$  ( $\mathbf{A}_0$ , black line in Figure 1(a)) utilising Eq. (S2):

$$\mathbf{A}_{\text{IL}}^x = \mathbf{t}^x \mathbf{A}_0, \quad (\text{S2})$$

in which

$$\mathbf{t}^x = \begin{pmatrix} t_1 \\ t_2 \\ \vdots \\ t_8 \end{pmatrix} = \mathbf{I} - \frac{x}{c_{\text{IL},0}} \mathbf{c}_{\text{Li}}, \quad \mathbf{c}_{\text{Li}} = \begin{pmatrix} c_{\text{Li},1} \\ c_{\text{Li},2} \\ \vdots \\ c_{\text{Li},8} \end{pmatrix}, \quad \mathbf{I} = \begin{pmatrix} 1 \\ 1 \\ \vdots \\ 1 \end{pmatrix}, \quad (\text{S3})$$

where  $c_{\text{IL},0}$  is the molar concentration of  $[\text{DCA}]^-$  in pure  $[\text{BMP}][\text{DCA}]$  (4.9 M), the numbers from 1 to 8 are the experiment numbers using  $[\text{BMP}][\text{DCA}]$  and different  $\text{Li}^+$  concentrations in the range of 0.054–0.27 M, and  $x$  is the test electronic coordination number (ECN) of  $[\text{DCA}]^-$  with electronic states affected by  $\text{Li}^+$ . For each test ECN ( $3 \leq x \leq 9$ ),  $\mathbf{A}_{\text{IL}}^x$  was calculated using Eqs. (S2) and (S3). Furthermore,  $\Delta \mathbf{A}^x$  can be calculated as follows:

$$\Delta \mathbf{A}^x = \mathbf{A} - \mathbf{t}^x \mathbf{A}_0. \quad (\text{S4})$$

Using the MCR-ALS algorithm for several  $x$  values ( $3 \leq x \leq 9$ ),  $\Delta \mathbf{A}^x$  was decomposed into spectral profiles ( $\mathbf{S}^x$ ) and contribution profiles ( $\mathbf{C}^x$ ) as follows:

$$\Delta \mathbf{A}^x = \mathbf{C}^x \mathbf{S}^{xT} + \mathbf{E}, \quad (\text{S5})$$

$\mathbf{S}^{xT}$  is the transposed matrix of  $\mathbf{S}^x$ . The decomposed matrices were determined via the singular value decomposition and the ALS method, by minimising the residual error matrix ( $\mathbf{E}$ ) in a least square sense under the condition that all signs in  $\mathbf{S}^x$  were positive. All MCR-ALS calculations were conducted using the

Unscrambler® X 10.5.1 software.  $\Delta A^x$  was decomposed into two components:  $\alpha$  and  $\beta$ , using MCR-ALS calculations. The obtained  $S^x$  ( $S_\alpha^x$  and  $S_\beta^x$ ) and  $C^x$  ( $C_\alpha^x$  and  $C_\beta^x$ ) spectra are presented in Figures 4 and S3, respectively. Moreover,  $\Delta A^x$  can be expressed as a sum:

$$\Delta A^x = C_\alpha^x S_\alpha^{xT} + N^x \quad (N^x := C_\beta^x S_\beta^{xT}). \quad (S6)$$

Using Eqs. (S4) and (S6),  $A$  was decomposed into three terms:

$$A = A_{IL}^x + C_\alpha^x S_\alpha^{xT} + N^x, \quad (S7)$$

and each of the terms in Eq. (S7) is presented in Figures 5 and S4.

We observed two tendencies. First, Figures 4 and S3 illustrate that  $C_\alpha^x$  became increasingly proportional with the concentration of  $Li^+$  as  $x$  increased, which is described using Eq. (S8):

$$C_\alpha^x = k_x c_{Li} \quad (k_x: constant), \quad (S8)$$

and the fitting results and coefficients of determination ( $R^2$ ) are also presented in these figures. Second, the contribution of the other spectra matrix ( $N^x$ ) to  $A$  (Figures 5 and S4) decreased as  $x$  increased. The quantitative spectral contributions of  $N^x$  to  $A$  were defined as a noise ratio, as follows:

$$Noise\ ratio = \frac{\sum_{n=1}^8 \int_{180}^{250} |N_n^x| d\lambda}{\sum_{n=1}^8 \int_{180}^{250} |A_n| d\lambda}. \quad (S9)$$

When its contribution was negligible,  $N^x$  could be ignored. Therefore, we successfully separated  $A$  into  $t^x A_0$  (the absorption spectra matrix of pure [BMP][DCA]) and  $c_{Li} \bar{A}^x$  (the absorption spectra matrix of [DCA]<sup>-</sup> affected by  $Li^+$  or including those of pure):

$$A = t^x A_0 + c_{Li} \bar{A}^x \quad (\bar{A}^x = k_x S_\alpha^{xT}). \quad (S10)$$

Figure S5 depicts the relationship between the noise ratios and  $R^2$  for each  $x$ . If Eq. (S10) is satisfied at the minimum  $x$ , it corresponds to ECN because  $c_{Li} \bar{A}^x$  can be simply expressed by absorption spectra of [DCA]<sup>-</sup> affected by  $Li^+$ . The correlational plot (Figure S5) converges at  $x = 5$ , suggesting that ECN is 5.

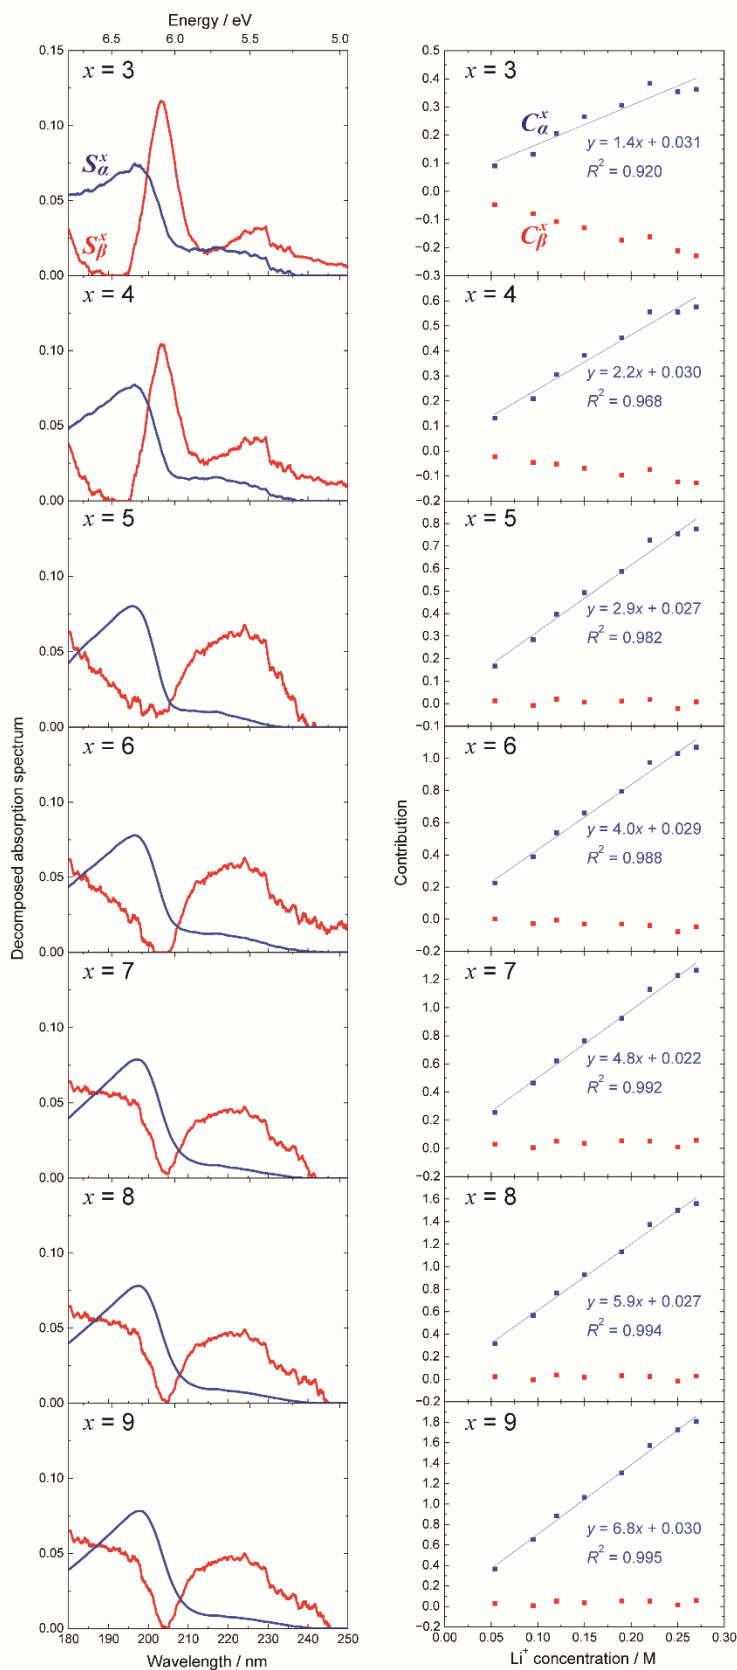

Figure S3 Decomposition of  $\Delta A^x$  into two absorption spectra ( $S_\alpha^x$  and  $S_\beta^x$ ) and two contributions ( $C_\alpha^x$  and  $C_\beta^x$ ) using the multivariable curve resolution–alternating least squares algorithm for each test ECN ( $x$ ). All  $S_\alpha^x$  and  $S_\beta^x$  spectra were unit-vector normalised. The results of the linear fittings and the coefficients of determination ( $R^2$ ) are also illustrated.

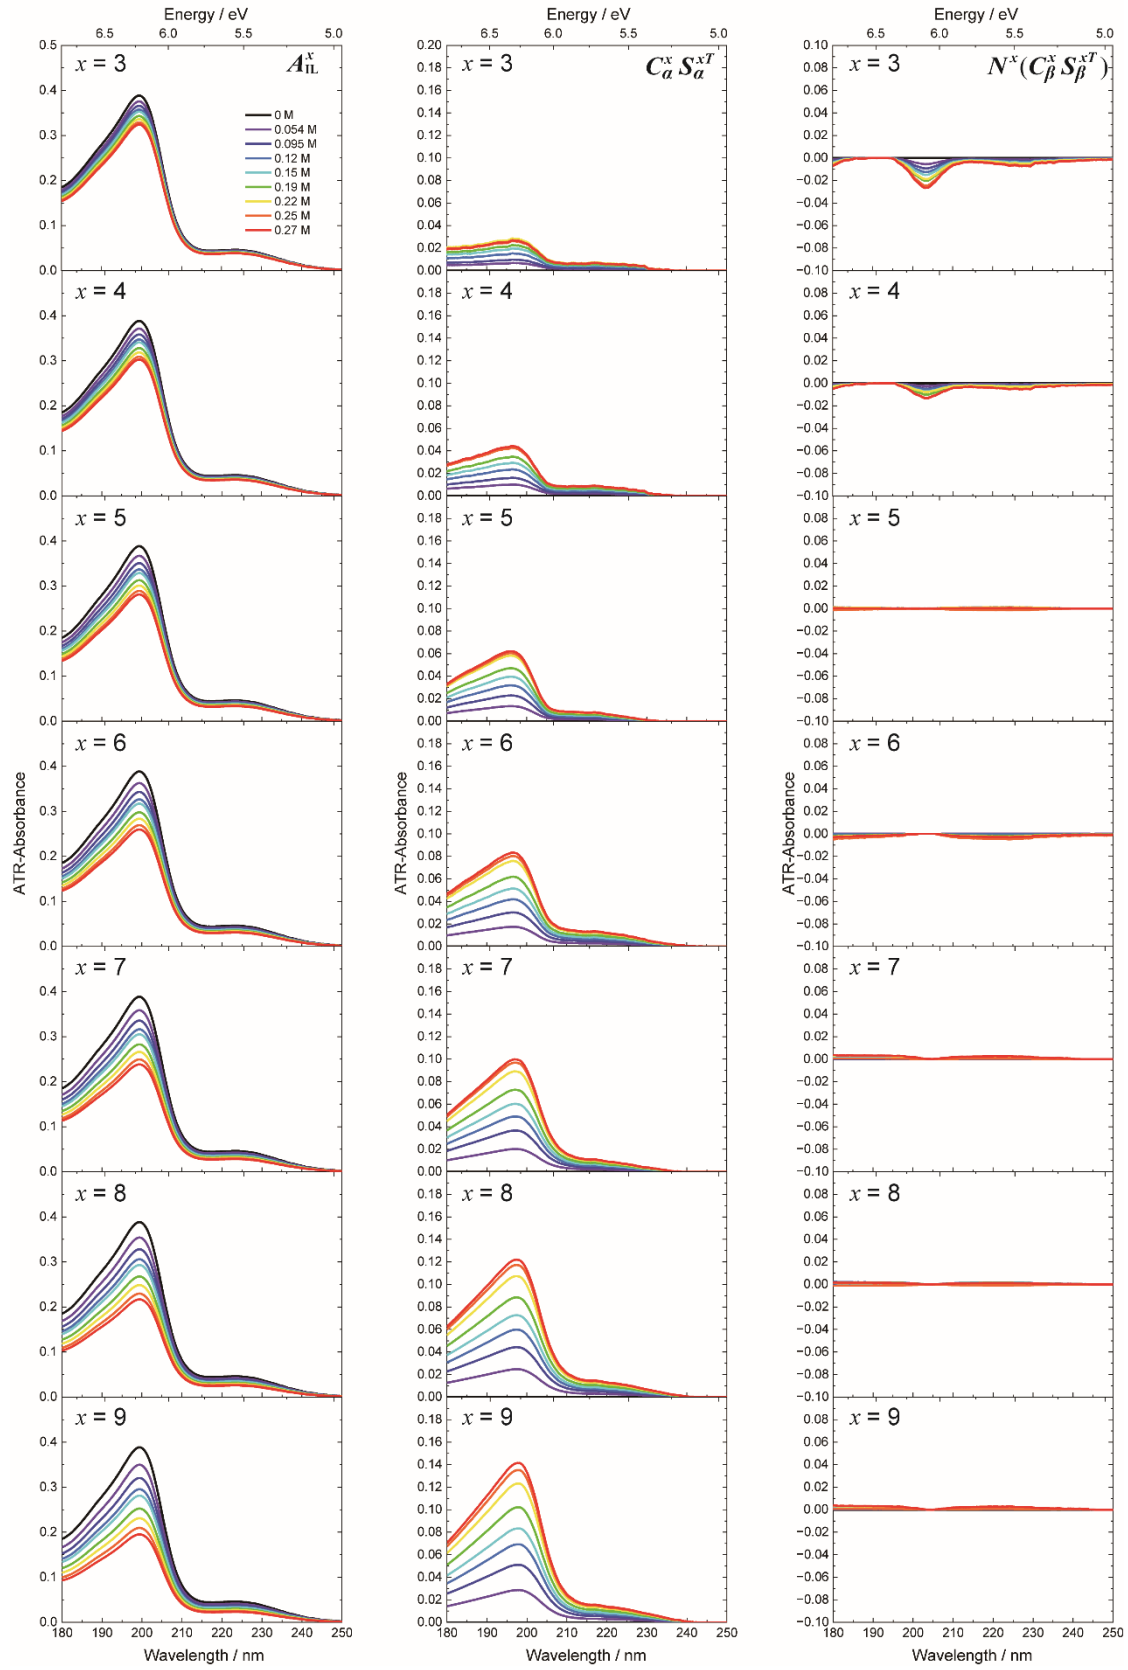

Figure S4 The terms of the absorption spectra in Eq. (S7):  $A_{IL}^x(t^x A_0)$ ,  $C_a^x S_a^{xT}$ , and  $N^x(C_\beta^x S_\beta^{xT})$  evaluated for each test ECN ( $x$ ). The coloured lines represent different concentration of  $Li^+$ . The noise ratios in Eq. (S9) were determined by integrating the absorption spectra of  $N^x(C_\beta^x S_\beta^{xT})$  with absolute values.

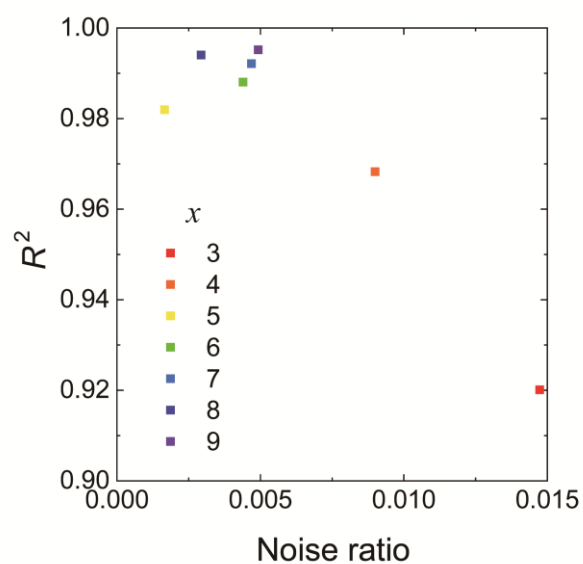

Figure S5 Relationship between noise ratios and coefficients of determination ( $R^2$ ) of  $\mathcal{C}_\alpha^x$  for various test ECN ( $3 \leq x \leq 9$ ) illustrated as coloured dots in the legend.



### 3. Distance-dependent TD-DFT calculations of $\text{Li}[\text{DCA}]^-$

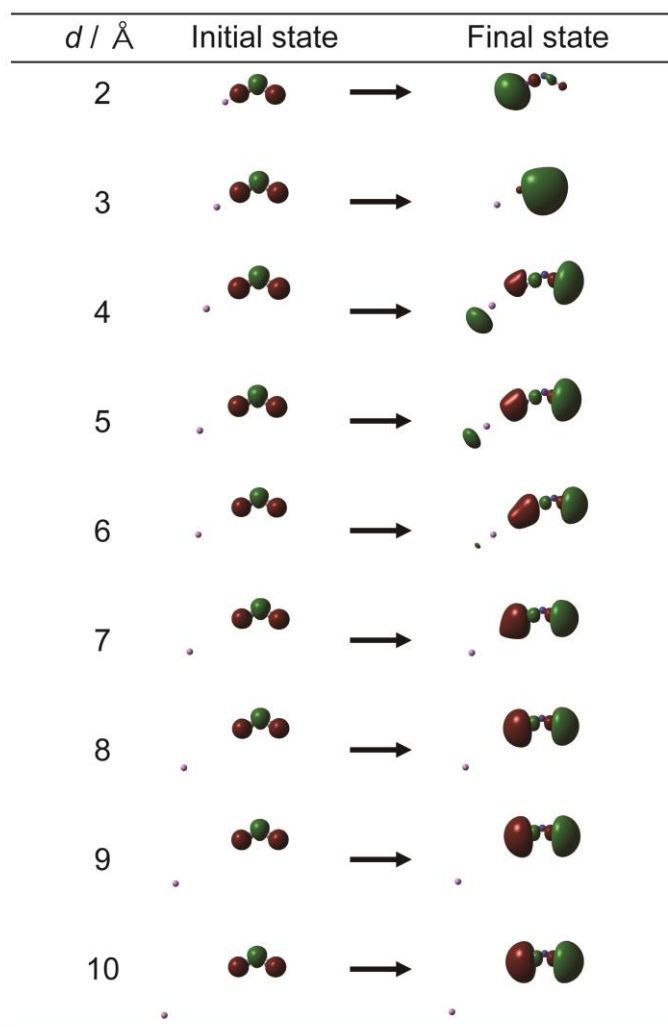

Figure S6 Results of time-dependent density functional theory calculations for the intermolecular distance ( $d$ ) between  $\text{Li}^+$  and the nearest terminal N atom of  $[\text{DCA}]^-$ . The intermolecular distances between  $\text{Li}^+$  and the nearest terminal N atom of  $[\text{DCA}]^-$  were changed from 2 to 10  $\text{\AA}$  along the N–CN bond of the  $[\text{DCA}]^-$  using 1  $\text{\AA}$  steps and the other geometries of  $\text{Li}[\text{DCA}]$  illustrated in Figure 2(a) were maintained. Main initial and final molecular orbitals were extracted.

## 4. Residence autocorrelation function

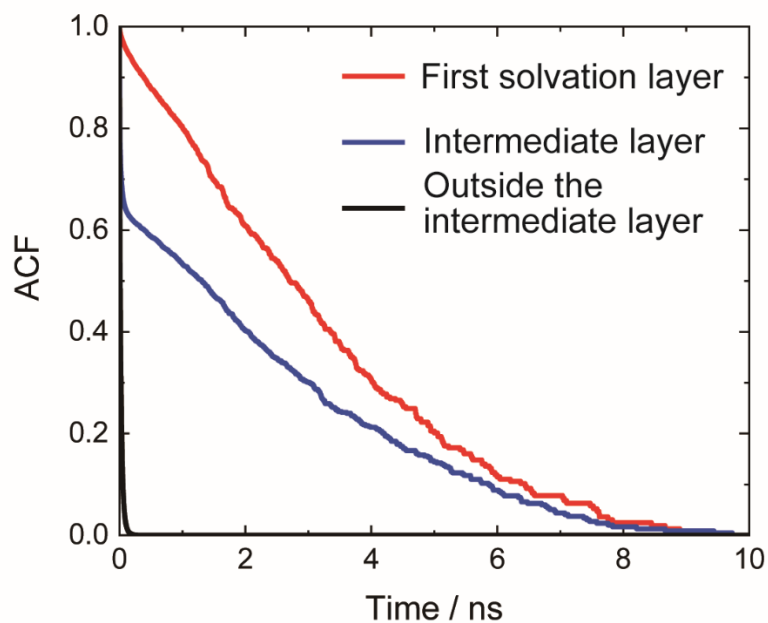

Figure S7 Averaged residence autocorrelation functions (ACF) of the terminal N atoms in the first solvation layer ( $0 \leq r \leq 3.32$  Å), intermediate layer ( $3.32 \leq r \leq 7.00$  Å), and outside the intermediate layer ( $7.00 \leq r \leq 10.0$  Å). The depicted AFCs were calculated as the averaged values of three ACFs obtained in 0–10, 10–20, 20–30 ns.
